# Supplementary material
Source: Research Square preprint supplement (doi:10.21203/rs.3.rs-8695459/v1)
Supplement: Supplementary file 1 [file 089835b1028c99e0e83459f4.xlsx]

## Sheet: Final Selection
Database Spreadsheet
Title	Authors	Year	Database	Themes	Populations	Biomes	Animal	DOI	Type of study
On the Hyacinth macaw's nesting tree: density of young manduvis around adult trees under three different management conditions in the Pantanal wetland, Brazil.	Johnson M. A., Tomas W. M. & Guedes N. M. R.	1997	Google Scholar	Ecology	Southern Pantanal	Pantanal	x	http://www.revbrasilornitol.com.br/BJO/article/view/0712	Scientific Notes
Karyotype description of two Neotropical Psittacidae species:: the endangered Hyacinth Macaw, Anodorhynchus hyacinthinus, and the Hawk-headed Parrot, Deroptyus accipitrinus (Psittaciformes: Aves), and its significance for conservation plans	Lunardi V. O., Francisco M. R., Rocha G. T., Goldschmidt B., Junior P. M. G.	2003	Web of Science	Genetics	x	x	Captive	https://doi.org/10.1590/S1415-47572003000300011	Empirical
Hyacinth Macaw (Anodorhynchus hyacinthinus) Reproduction in the Northern Pantanal, Mato Grosso, Brazil	Pinho J. B. & Nogueira F. M. B.	2003	Google Scholar	Ecology	Northern Pantanal	Pantanal	Wild	https://digitalcommons.usf.edu/ornitologia_neotropical/vol14/iss1/3	Empirical
Management and Conservation of the Large Macaws in the Wild	Guedes N. M. R.	2004	Web of Science	Conservation	Southern Pantanal	Pantanal	Wild	https://digitalcommons.usf.edu/ornitologia_neotropical/vol15/iss5/28	Reviews
Chlamydophila psittaci in free-living Blue-fronted Amazon parrots (Amazona aestiva) and Hyacinth macaws (Anodorhynchus hyacinthinus) in the Pantanal of Mato Grosso do Sul, Brazil	Raso T. F., Seixas G. H. F., Guedes N. M, R. & Pinto, A. A.	2006	ScienceDirect	Animal Health	Southern Pantanal	Pantanal	Wild	https://doi.org/10.1016/j.vetmic.2006.06.025	Empirical
Handling technique to increase the hyacinth macaw population (Anodorhynchus hyacinthinus) (Lalham, 1720): report of an experience in Pantanal, Brazil	Kuniy A. A., Figueiredo I. C. S., Guedes N. M. R.	2006	Web of Science	Ecology	Southern Pantanal	Pantanal	Wild	https://doi.org/10.1590/S1519-69842006000200021	Scientific Notes
Behavioral Categories of Hyacinth Macaws (Anodorhynchus hyacinthinus) during the Reproductive Period, at South Pantanal, Brazil	Schneider L., Serbena A. L. & Guedes N. M. R.	2006	Google Scholar	Behaviour	Southern Pantanal	Pantanal	Wild	https://pepsic.bvsalud.org/scielo.php?script=sci_arttext&pid=S1517-28052006000200003	Empirical
Appraisal of the age of the trees used as nests by the Hyacinth Macaw in the Pantanal, Mato Grosso	Júnior A. S., Ishii I. H., Guedes N. M. R. & Almeida F. L. R.	2006	Google Scholar	Ecology	Southern Pantanal	Pantanal	x	https://www.cabidigitallibrary.org/doi/full/10.5555/20073031963	Empirical
USO DO SISTEMA DE INFORMAÇÃO GEOGRÁFICA (SIG) EM TRABALHOS DE CONSERVAÇÃO DAS ARARAS-AZUIS E VERMELHAS NO PANTANAL SULMATO-GROSSENSE	Guedes N. M. R., Macieira A. C. & Barbosa M. C. T.	2006	Google Scholar	Ecology	Southern Pantanal	Pantanal	Wild	x	Empirical
ARARA-AZUL: A UTILIZAÇÃO DE UMA ESPÉCIE AMEAÇADA EM ATIVIDADES DE EDUCAÇÃO PARA A CONSERVAÇÃO	Corrêa N. G. & Guedes N. M. R.	2006	Google Scholar	Conservation	Southern Pantanal	Pantanal	x	https://www.redalyc.org/articulo.oa?id=26012809009	Empirical
Quantifying the illegal parrot trade in Santa Cruz de la Sierra, Bolivia, with emphasis on threatened species	Herrera M. & Hennessey B.	2007	Web of Science	Conservation	x	x	Wild	https://doi.org/10.1017/S0959270907000858	Empirical
Nesting of the Collared forest-falcon Micrastur semitorquatus (Ayes: Falconidae) in the Pantanal, Brazil:: biometry, nestling diet and competition with macaws	Carrara L. A., Antas P. T. Z. & Yabe R. S.	2007	Web of Science	Ecology	Northern Pantanal	Pantanal	Wild	http://www.revbrasilornitol.com.br/BJO/article/view/2808	Empirical
Occurrence of Hyacinth Macaw nesting sites in Sterculia apetala in the Pantanal Wetland, Brazil	Júnior A. S., Tomas W. M., Ishii I. H., Guedes N. M. R. & Hay J. D.	2007	Google Scholar	Ecology	Southern Pantanal	Pantanal	x	https://periodicos.ufpb.br/ojs/index.php/gaia/article/view/2268	Empirical
Identificação da microbiota da orofaringe e cloaca em filhotes de arara-azul-grande (Anodorhynchus hyacinthinus) de vida livre do Pantanal-MS	Loiko M. R., Abilheira F. S., Guedes N. M. R., Passos D. T., Weimer T. A., Oliveira S. J. & Allgayer M. C.	2007	Google Scholar	Animal Health	Southern Pantanal	Pantanal	Wild	http://posgrad.ulbra.br/periodicos/index.php/ic/article/view/1686/1227	Empirical
Conservation puzzle: Endangered hyacinth macaw depends on its nest predator for reproduction	Pizo M. A., Donatti C. I., Guedes N. M. R. & Galetti M.	2008	ScienceDirect	Ecology	Southern Pantanal	Pantanal	Wild	https://doi.org/10.1016/j.biocon.2007.12.023	Empirical
Genetic variation and population structure of the endangered Hyacinth Macaw (Anodorhynchus hyacinthinus): implications for conservation	Faria P. J., Guedes N. M. R., Yamashita C., Martuscelli P. & Miyaki C. Y.	2008	SpringerLink	Genetics	Pantanal Southern/Central	Pantanal/Cerrado	Wild	https://doi.org/10.1007/s10531-007-9312-1	Empirical
Salmonella Braenderup isolation in Hyacinth macaw (Anodorhynchus hyacinthinus)	Allgayer M. C., Oliveira S. J., Mottin V. D., Loiko M. R., Abilleira F., Guedes N. M. R., Passos D. T., Weimer T. A.	2009	Web of Science	Animal Health	Southern Pantanal	Pantanal	Wild	https://doi.org/10.1590/S0103-84782009005000171	Scientific Notes
Clinical Pathology and Parasitologic Evaluation of Free-Living Nestlings of the Hyacinth Macaw (Anodorhynchus hyacinthinus)	Allgayer M. C., Guedes N. M. R., Chiminazzo C., Cziulik M. & Weimer T. A.	2009	Web of Science	Animal Health	Southern Pantanal	Pantanal	Wild	https://doi.org/10.7589/0090-3558-45.4.972	Empirical
First record of Hyacinth Macaw Anodorhynchus hyacinthinus (Latham, 1790) for the state of Amazonas, Brazil	Barreiros M. H. & Gomes F. B. R.	2010	Web of Science	Ecology	Northern	Amazon	Wild	http://revbrasilornitol.com.br/BJO/article/view/4106	Scientific Notes
Birds of Tocantins, Brazil – 2: Jalapão region	Pacheco J. F. & Olmos F.	2010	Web of Science	Ecology	Central	Cerrado	Wild	http://revbrasilornitol.com.br/BJO/article/view/3801/0	Empirical
The birds of Estacao Ecologica Serra Geral do Tocantins.	Rego M. A., Silveira L. F., Piacentini V. Q., Schunck F., Machado E., Pinheiro R. T. & Reis E.	2011	Web of Science	Ecology	Central	Cerrado	Wild	https://doi.org/10.1590/S1676-06032011000100027	Empirical
Survival on the ark: life-history trends in captive parrots	Young A. M., Hobson A., Lackey L. B. & Wright T. F.	2011	Google Scholar	Ecology	x	x	Captive	https://doi.org/10.1111/j.1469-1795.2011.00477.x	Empirical
Competition for cavity between Anodorhynchus hyacinthinus (Latham, 1790) (Psittacidae) and Tyto alba (Scopoli, 1769) (Tytonidae) in the Pantanal of Paiaguas region, Corumba, Mato Grosso do Sul, Brazil	Tortato F. R. & Bonanomi J.	2012	Web of Science	Ecology	Southern Pantanal	Pantanal	Wild	https://repositorio.inpa.gov.br/handle/1/16141?mode=full	Scientific Notes
The illegal parrot trade: a literature review	Pires S. F.	2012	Google Scholar	Conservation	x	x	x	https://doi.org/10.1080/17440572.2012.700180	Reviews
Poaching, habitat loss and the decline of neotropical parrots: a comparative spatial analysis	Clarke R. V. & By R. A.	2013	SpringerLink	Conservation	x	x	x	https://doi.org/10.1007/s11292-013-9177-0	Empirical
CHLAMYDOPHILA PSITTACI INFECTIONS IN HYACINTH MACAWS (ANODORHYNCHUS HYACINTHINUS) CONFISCATED IN BRAZIL	Raso T. F., Teixeira R. H. F., Carrasco A. O. T., Júnior J. P. A. & Pinto A. A.	2013	Web of Science	Animal Health	x	x	Wild	https://doi.org/10.1638/1042-7260-44.1.169	Empirical
Ocorrências da Arara-azul-grande (Anodorhynchus hyacinthinus) no Estado do Tocantins: distribuição, implicações biogeográficas e conservação	Dornas T.; Barbosa M. O.; Leite G.; Pinheiro R. T.; Prado A. D.; Crozariol M. A.; Carrano E.	2013	Google Scholar	Ecology	Central	Cerrado	Wild	https://ava.icmbio.gov.br/mod/data/view.php?d=17&rid=2691	Empirical
Flagships or Battleships Deconstructing the Relationship between Social Conflict and Conservation Flagship Species	Douglas L. R. & Veríssimo D.	2013	Google Scholar	Conservation	x	x	x	http://dx.doi.org/10.3167/ares.2013.040107	Reviews
Development of microsatellite markers for Hyacinth macaw (Anodorhynchus hyacinthinus) and their cross-amplification in other parrot species Genetics	Silva H. E., Presti F. T., Wasko A. P. & Pinhal D.	2015	SpringerLink	Genetics	Pantanal (SouthernNorthern)/Northern/Central	Pantanal/Cerrado/Amazon	Wild	https://doi.org/10.1186/s13104-015-1749-9	Empirical
Organized crime or crime that is organized? The parrot trade in the neotropics	Pires S. F., Schneider J. L. & Herrera M.	2015	SpringerLink	Conservation	x	x	Wild	https://doi.org/10.1007/s12117-015-9259-7	Empirical
Population Genetic Structure in Hyacinth Macaws (Anodorhynchus hyacinthinus) and Identification of the Probable Origin of Confiscated Individuals	Presti F. T., Guedes N. M. R., Antas P. T. Z. & Miyaki C. Y.	2015	Web of Science	Genetics	Pantanal (SouthernNorthern)/Northern/Central	Pantanal/Cerrado/Amazon	Wild	https://doi.org/10.1093/jhered/esv038	Empirical
Seasonal effects and antifungal activity from bark chemical constituents of Sterculia apetala (Malvaceae) at Pantanal of Miranda, Mato Grosso do Sul, Brazil	Fontoura F. M., Matias R., Ludwig J., Oliveira A. K. M., Bono J. A. M., Martins P. F. R. B., Corsino J. & Guedes N. M. R.	2015	Web of Science	Ecology	Southern Pantanal	Pantanal	x	https://doi.org/10.1590/1809-4392201500011	Empirical
Relationship between weight, age and hatching success and the concentration of heavy metals in nestling blue macaw (Anodorhynchus hyacinthinus Latham, 1790) in the Pantanal, Mato Grosso do Sul	Marchesi M. D., Rossi J. L., Guedes N. M. R., Carneiro M. T. W. D., Endringer D. C., Filho C. B. C.	2015	Scopus	Animal Health	Southern Pantanal	Pantanal	Wild	https://doi.org/10.1590/S0100-736X2015000600014	Empirical
Attalea phalerata MART. EX SPRENG.: ASPECTOS BOTÂNICOS, ECOLÓGICOS, ETNOBOTÂNICOS E AGRONÔMICOS	Negrelle R. R. B.	2015	Scielo	Ecology	x	x	x	https://doi.org/10.5902/1980509820669	Reviews
Ecological and socio-economic factors affecting extinction risk in parrots	Olah G., Butchart S. H. M., Symes A., Guzmán I. M., Cunningham R., Brightsmith D. J. & R. Heinsohn	2016	SpringerLink	Conservation	x	x	x	https://doi.org/10.1007/s10531-015-1036-z	Empirical
Human preferences for species conservation: Animal charisma trumps endangered status	Colleony A., Clayton S., Couvet D., Jalme M. S. & Prevot A. C.	2017	ScienceDirect	Conservation	x	x	x	https://doi.org/10.1016/j.biocon.2016.11.035	Empirical
Current threats faced by Neotropical parrot populations	Berkunsky I., Quillfeldt P., Brightsmith D. J., Abbud M. C., Aguilar J. M. R. E., Aleman-Zelaya U., Aramburu R. M., Arce A. A., Balas M. R., Balsaby T. J. S., Barredo B. J. M., Beissinger S. R., Rosales M., Berg K, S, Bianchi C. A., Blanco E., Bodrati A., Bonilla-Ruz C., Botero-Delgadillo E., Carnavelli S. B., Masello J. F., Caparroz R., Cepeda R.E., Chassot O., Cinta-Magallón C., Cockle K.L., Da…	2017	ScienceDirect	Conservation	x	x	x	https://doi.org/10.1016/j.biocon.2017.08.016	Empirical
Hyacinth macaws (anodorhynchus hyacinthinus, psittacidae) feeding on termites	Paula G. A., Laps R. & Fischer E.	2017	Web of Science	Ecology	Southern Pantanal	Pantanal/Cerrado	Wild	https://doi.org/10.58843/ornneo.v28i0.247	Scientific Notes
Conhecendo a arara-azul-grande: confecção e aplicação de um jogo didático como parte das ações de Educação Ambiental visando a conservação da espécie	Presti F. T., Almeida T. R. A., Silva G. F., Silva H. E., Conrado L. P., Cespede L., Rdrigues T. M., Barbirato M. & Wasko A. P.	2017	Google Scholar	Conservation	Northern	Amazon	x	https://doi.org/10.34024/revbea.2017.v12.1982	Empirical
Ecological functions of parrots: an integrative perspective from plant life cycle to ecosystem functioning	Blanco G., Hiraldo F. & Tella J. L.	2017	Google Scholar	Ecology	x	x	x	https://doi.org/10.1080/01584197.2017.1387031	Reviews
Bird vulnerability to climate and land use changes in the Brazilian Cerrado	Borges F. J. A., Ribeiro B. R., Lopes L. E. & Loyola R.	2019	ScienceDirect	Conservation	Central	Cerrado	Wild	https://doi.org/10.1016/j.biocon.2019.05.055	Empirical
Hyacinth Macaw (Anodorhynchus hyacinthinus) nests in a mosaic of protected areas in Carajás and surrounding areas, state of Pará, Brazil	Silva G. F., Presti F. T., Rechetelo J., Guedes N. M. R., Wasko A. P. & Donatelli R. J.	2019	SpringerLink	Ecology	Northern	Amazon	Wild	https://doi.org/10.1007/BF03544469	Empirical
Genetic analysis of the endangered Hyacinth Macaw (Anodorhynchus hyacinthinus) based on mitochondrial markers: different conservation efforts are required for different populations	Almeida T. R. A., Presti F. T., V. P. Cruz & Wasko A. P.	2019	SpringerLink	Genetics	Pantanal (SouthernNorthern)/Northern/Central	Pantanal/Cerrado/Amazon	Wild	https://doi.org/10.1007/s10336-019-01652-z	Empirical
Long-term monitoring of a hyacinth macaw Anodorhynchus hyacinthinus (Psittacidae) roost in the Pantanal, Brazil	Neto P. S., Guedes N. M. R. & Toledo M. C. B.	2019	Web of Science	Ecology	Northern Pantanal	Pantanal	Wild	https://doi.org/10.3354/esr00954	Empirical
Conserving the diversity of ecological interactions: The role of two threatened macaw species as legitimate dispersers of "megafaunal" fruits	Tella J. L., Hiraldo F., Pacifico E., Luque J. A. D., Dénes F. V., Fontoura F. M., Guedes N. M. R. & Blanco G.	2020	Web of Science	Ecology	Pantanal (SouthernNorthern)/Central	Pantanal/Cerrado	Wild	https://doi.org/10.3390/d12020045	Empirical
Main trends and gaps in studies for bird conservation in the pantanal wetland	Frota A. V. B., Vitorino B. D., Nunes J. R. S. & Silva C. J.	2020	ScienceDirect	Conservation	Pantanal Northern/Southern	Pantanal	x	https://doi.org/10.3897/neotropical.15.e52905	Reviews
Global trade in parrots – Influential factors of trade and implications for conservation	Chan D. T. C., Poon E. S. K., Wong A. T. C. & Sin S. Y. W.	2021	ScienceDirect	Conservation	x	x	x	https://doi.org/10.1016/j.gecco.2021.e01784	Empirical
The relationship between scale and predictor variables in species distribution models applied to conservation	Oliveira M. R., Tomas W. M., Guedes N. M. R., Peterson A. T., Szabo J. K., Júnior A. S., Camilo A. R., Padovane C. R. & Garcia L. C.	2021	SpringerLink	Ecology	Pantanal Northern/Southern	Pantanal	Wild	https://doi.org/10.1007/s10531-021-02176-w	Empirical
Organophosphate poisoning of Hyacinth Macaws in the Southern Pantanal, Brazil	Vicente E. C. & Guedes N. M. R.	2021	SpringerLink	Animal Health	Southern Pantanal	Pantanal	Wild	https://doi.org/10.1038/s41598-021-84228-3	Scientific Notes
Lack of protected areas and future habitat loss threaten the Hyacinth Macaw (Anodorhynchus hyacinthinus) and its main food and nesting resources	Oliveira M. R., Szabo J. K., Júnior A. S., Guedes N. M. R., Tomas W. M., Camilo A. R., Padovane C. R., Peterson A. T. & Garcia L. C.	2021	Web of Science	Ecology	Pantanal Northern/Southern	Pantanal	Wild	https://doi.org/10.1111/ibi.12982	Empirical
Multi-decadal land use impacts across the vast range of an iconic threatened species	Devenish C., Lees A. C., Collar N. J. & Marsden S. J.	2021	Web of Science	Conservation	x	x	Wild	https://doi.org/10.1111/ddi.13395	Empirical
Seed predation by macaws favors fruits with less seeds and thicker endocarps in the palm Attalea phalerata	Barros C. S. & Pires A. S.	2021	Google Scholar	Ecology	Southern Pantanal	Pantanal	Wild	https://doi.org/10.1590/0102-33062020abb0462	Empirical
The mutualism–antagonism continuum in Neotropical palm–frugivore interactions: from interaction outcomes to ecosystem dynamics	Dracxler C. M. & Kissling W. D.	2021	Google Scholar	Ecology	x	x	x	https://doi.org/10.1111/brv.12809	Reviews
A Literature Synthesis of Actions to Tackle Illegal Parrot Trade	Mercado A. S., Paris J. R. F., Rodríguez J. P. & Tella J. L.	2021	Google Scholar	Conservation	x	x	x	https://doi.org/10.3390/d13050191	Reviews
Growth model analysis of wild hyacinth macaw (Anodorhynchus hyacinthinus) nestlings based on long-term monitoring in the Brazilian Pantanal	Guedes N. M. R., Toledo M. C. B., Fontoura F. M., Silva G. F. & Donatelli R. J.	2022	SpringerLink	Ecology	Pantanal Northern/Southern	Pantanal/Cerrado	Wild	https://doi.org/10.1038/s41598-022-19677-5	Empirical
The role of social media groups on illegal wildlife trade in four Mexican states: A year-long assessment	Picazo R. I. S., Bravo O. E. R., Padilha I. M. & Rivera E. E. C.	2023	ScienceDirect	Conservation	x	x	Wild	https://doi.org/10.1016/j.gecco.2023.e02539	Empirical
Wildfires Jeopardise Habitats of Hyacinth Macaw (Anodorhynchus hyacinthinus), a Flagship Species for the Conservation of the Brazilian Pantanal	Ferreira B. H. S., Oliveira M. R., Rodrigues J. A., Fontoura F. M., Guedes N. M. R., Szabo J. K., Libonati R. & Garcia L. C.	2023	SpringerLink	Ecology	Pantanal Northern/Southern	Pantanal	Wild	https://doi.org/10.1007/s13157-023-01691-6	Empirical
First record of free-living hyacinth macaw (Anodorhynchus hyacinthinus) eggs hatching using camera traps in southern Pantanal, Brazil	Ramalho K. R. A., Fontoura F. M. & Guedes N. M. R.	2024	SpringerLink	Ecology	Southern Pantanal	Pantanal	Wild	https://doi.org/10.1007/s43388-024-00207-y	Scientific Notes
Prioritizing Conservation Areas for the Hyacinth Macaw (Anodorhynchus hyacinthinus) in Brazil From Low-Coverage Genomic Data	Vilaça S. T., Dalapicolla J., Soares R., Guedes N. M. R., Miyaki C. Y. & Aleixo A.	2024	Web of Science	Genetics	Pantanal (SouthernNorthern)/Northern/Central	Pantanal/Cerrado/Amazon	Wild	https://doi.org/10.1111/eva.70039	Empirical
Estimated and in vivo measurements of bite force demonstrate exceptionally large bite forces in parrots (Psittaciformes)	Harrison S. L., Sutton G. P., Herrel A. & Deeming D. C.	2024	Scopus	Behaviour	x	x	Captive	https://doi.org/10.1111/joa.14144	Empirical
Ecology and conservation of cavity-nesting birds in the Neotropics: Recent advances, future directions, and contributions to ornithology	Bonaparte E. B., Lima C. C., Xavier H. D. F., Hora J. S., Sallo F. G. D., López F. G., Cockle K. L. & Montellano M. G. N.	2024	Google Scholar	Conservation	x	x	x	https://doi.org/10.1093/ornithapp/duae042	Reviews
Analysis of antibiotic resistance in Gram-negative bacilli in wild and exotic healthy birds in Brazil: A warning sign	Ramos C. A.; Ferreira C. J.; Ballaben A. S.; Filho R. A. C. P.; Darini A. L. C.	2024	ScienceDirect	Animal Health	x	x	Captive	https://doi.org/10.1016/j.vetmic.2024.110196	Empirical
Avifauna of Serra Vermelha, southern Piaui, Brazil	Santos M. P. D.; Santana A.; Soares L. M. S.; Sousa S. A.	2012	Web of Science	Ecology	Central	Cerrado	Wild	http://revbrasilornitol.com.br/BJO/article/view/4904	Empirical
Birds of Tocantins 1. Southeast region	Pacheco J. F.; Ólmos F.	2006	Scopus	Ecology	Central	Cerrado	Wild	x	Empirical
Firts report of Ascaridia hermaphrodita in the Brazilian Hyacinth macaw	Barros L. A.; Fedullo L. P. L.; Almeida F. M.; Pinto R. M.	2002	Google Scholar	Animal Health	x	x	Captive	https://periodicos.uff.br/rbcv/article/view/7552	Scientific Notes
Preliminary observations of tool use in captive hyacinth macaws (Anodorhynchus hyacinthinus)	A. Borsari & E. B. Ottoni	2005	SpringerLink	Behaviour	x	x	Captive	https://doi.org/10.1007/s10071-004-0221-3	Empirical
Birds of a latitudinal transect in the Tapajós-Xingu interfluvium, eastern Brazilian Amazonia	Pacheco J. F.; Ólmos F.	2005	Scopus	Ecology	Northern	Amazon	Wild	http://www.revbrasilornitol.com.br/BJO/article/view/2102	Empirical
Means to an end: Neotropical parrots manage to pull strings to meet their goals	Paim C. S.; Borsari A.; Ottoni E. B.	2008	SpringerLink	Behaviour	x	x	Captive	https://doi.org/10.1007/s10071-008-0190-z	Empirical
Telomere- and oxidative stress dynamics in Psittacidae species with different longevity trajectories	Barros A. D.; Sifaoui I.; Guerra R. D.; Morales J. L.; Fuentes C. R.; Lanús E. C.	2024	SpringerLink	Genetics	x	x	Captive	https://doi.org/10.1007/s11357-024-01397-5	Empirical
Sex-specific median life expectancies from ex situ populations for 330 animal species	Castaldo J. P. C.; Byrne A.; Perisin K.; Faust L. J.	2019	SpringerLink	Conservation	x	x	Captive	https://doi.org/10.1038/sdata.2019.19	Empirical
An approach to the effects of longevity, sexual maturity, and reproduction on telomere length and oxidative stress in different Psittacidae species	Barros A. D.; Sifaoui I.; Borecka Z.; Guerra R. D.; Morales J. L.; Fuentes R. C.; Lanus E. C.	2023	Web of Science	Genetics	x	x	Captive	https://doi.org/10.3389/fgene.2023.1156730	Empirical

## Sheet: Database
		Número por base de dados
		Database	No duplications
		ScieceDirect	350
		SpringerLink	489
		Web of Science	582
		Scopus	251
		Scielo	25
		Google Scholar	1000
		Total	2697

## Sheet: Populations
	Quantity per Populations
	Populations	Quantity	%	Round
	Southern Pantanal	31	43.662	44
	Northern Pantanal	13	18.3099	18
	Central	12	16.9014	17
	Northern	8	11.2676	11
	x	27	38.0282	38

## Sheet: Themes
		Quantity per Themes
		Themes	Quantity	%	Round
		Ecology	31	43.662	44
		Conservation	19	26.7606	27
		Animal Health	9	12.6761	13
		Genetics	8	11.2676	11
		Behaviour	4	5.6338	5
		Total	71	100	100

## Sheet: Biomes
	Quantity per Biomes
	Biomes	Quantity	%	Round
	Pantanal	34	47.8873	48
	Cerrado	14	19.7183	20
	Amazon	8	11.2676	11
	x	27	38.0282	38

## Sheet: Sampling
	In situ or Ex situ?
	Animals	Quantity	%
	Captive	10	14.1
	Wild	42	59.2
	x	19	26.8

## Sheet: Type of Study
	Quantity per Type of Study
	Type of Study	Quantity	%	Round
	Empirical	53	74.6479	74
	Reviews	9	12.6761	13
	Scientific Notes	9	12.6761	13
	Total	71	100	100

## Sheet: Authors
	Quantity of Authors
	Authors	Total	%
	Guedes N. M. R.	27	38
	Presti F. T.	6	8
	Fontoura F. M.	5	7
	Tella J. L.	4	6
	Wasko A. P.	4	6
	Tomas W. M.	4	6
	Júnior A. S.	4	6
	Hiraldo F.	3	4
	Silva G. F.	3	4
	Oliveira M. R.	3	4
	Szabo J. K.	3	4
	Garcia L. C.	3	4
	Miyaki C. Y.	3	4
	Allgayer M. C.	3	4
	Weimer T. A.	3	4
	Brightsmith D. J.	2	3
	Douglas L.	2	3
	Pacifico E.	2	3
	Donatelli R. J.	2	3
	Toledo M. C. B.	2	3
	Silva H. E.	2	3
	Almeida T. R. A.	2	3
	Peterson A. T.	2	3
	Camilo A. R.	2	3
	Padovane C. R.	2	3
	Pires S. F.	2	3
	Oliveira S. J.	2	3
	Loiko M. R.	2	3
	Passos D. T.	2	3
	Antas P. T. Z.	2	3
	Blanco G.	2	3
	Ishii I. H.	2	3
	Pinto A. A.	1	1
	Seixas G. H. F.	1	1
	Raso T. F.	1	1
	Pizo M. A.	1	1
	Donatti C. I.	1	1
	Galetti M.	1	1
	Picazo R. I. S.	1	1
	Bravo O. E. R.	1	1
	Padilha I. M.	1	1
	Rivera E. E. C.	1	1
	Colleony A.	1	1
	Clayton S.	1	1
	Couvet D.	1	1
	Jalme M. S.	1	1
	Prevot A. C.	1	1
	Borges F. J. A.	1	1
	Ribeiro B. R.	1	1
	Lopes L.	1	1
	Loyola R.	1	1
	Chan D. T. C.	1	1
	Poon E. S. K.	1	1
	Wong A. T. C.	1	1
	Sin S. Y. W.	1	1
	Berkunsky I.	1	1
	Quillfeldt P.	1	1
	Abbud M. C.	1	1
	Aguilar J. M. R. E	1	1
	Aleman-Zelaya U.	1	1
	Aramburu R. M.	1	1
	Arce A. A.	1	1
	Balas M. R.	1	1
	Balsaby T. J. S.	1	1
	Barredo B. J. M.	1	1
	Beissinger S. R.	1	1
	Rosales M.	1	1
	Berg K. S.	1	1
	Bianchi C. A.	1	1
	Blanco E.	1	1
	Bodrati A.	1	1
	Bonilla-Ruz C.	1	1
	Botero-Delgadillo E.	1	1
	Carnavelli S. B.	1	1
	Caparroz R.	1	1
	Cepeda R.E.	1	1
	Chassot O.	1	1
	Cinta-Magallón C.	1	1
	Cockle K.L.	1	1
	Daniele G.	1	1
	de Araujo C.B.	1	1
	de Barbosa A.E.	1	1
	de Moura L.N.	1	1
	Del Castillo H.	1	1
	Díaz S.	1	1
	Díaz-Luque J.A.	1	1
	Figueroa Rodríguez A.	1	1
	García-Anleu R.A.	1	1
	Gilardi J.D.	1	1
	Grilli P.G.	1	1
	Guix J.C.	1	1
	Hernández M.	1	1
	Hernández-Muñoz A.	1	1
	Horstman E.	1	1
	Ibarra Portillo R.	1	1
	Isacch J.P.	1	1
	Jiménez J.E.	1	1
	Joyner L.	1	1
	Juarez M.	1	1
	Kacoliris F.P.	1	1
	Kanaan V.T.	1	1
	Klemann-Júnior L.	1	1
	Latta S.C.	1	1
	Lee A.T.K.	1	1
	Lesterhuis A.	1	1
	Lezama-López M.	1	1
	Lugarini C.	1	1
	Marateo G.	1	1
	Marinelli C.B.	1	1
	Martínez J.	1	1
	McReynolds M.S.	1	1
	Mejia Urbina C.R.	1	1
	Monge-Arias G.	1	1
	Monterrubio-Rico T.C.	1	1
	Nunes A.P.	1	1
	Nunes F. P.	1	1
	Olaciregui C.	1	1
	Ortega-Arguelles J.	1	1
	Pagano L.	1	1
	Politi N.	1	1
	Ponce-Santizo G.	1	1
	Portillo Reyes H.O.	1	1
	Prestes N.P.	1	1
	Renton K.	1	1
	Reyes-Macedo G.	1	1
	Ringler E.	1	1
	Rivera L.	1	1
	Rodríguez-Ferraro A.	1	1
	Rojas-Valverde A.M.	1	1
	Rojas-Llanos R.E.	1	1
	Rubio-Rocha Y.G.	1	1
	Saidenberg A.B.S.	1	1
	Salinas-Melgoza A.	1	1
	Sanz V.	1	1
	Schaefer H.M.	1	1
	Scherer-Neto P.	1	1
	Seixas G.H.F.	1	1
	Serafini P.	1	1
	Silveira L.F.	1	1
	Sipinski E.A.B.	1	1
	Somenzari M.	1	1
	Susanibar D.	1	1
	Torres-Sovero C.	1	1
	Trofino-Falasco C.	1	1
	Vargas-Rodríguez R.	1	1
	Vázquez-Reyes L.D.	1	1
	White T.H. Jr	1	1
	Williams S.	1	1
	Zarza R.	1	1
	Rechetelo J.	1	1
	Ramalho K. R. A.	1	1
	Pinhal D.	1	1
	Ferreira B. H. S.	1	1
	Rodrigues J. A.	1	1
	Libonati R.	1	1
	Faria P. J.	1	1
	Yamashita C.	1	1
	Martuscelli P.	1	1
	Cruz P.	1	1
	Vicente E. C.	1	1
	Clarke R. V.	1	1
	By R. A.	1	1
	Schneider J. L.	1	1
	Herrera M.	1	1
	Olah G.	1	1
	Butchart S. H. M.	1	1
	Symes A.	1	1
	Guzmán I. M.	1	1
	Cunningham R.	1	1
	Heinsohn R.	1	1
	Teixeira R. H. F.	1	1
	Carrasco A. O. T.	1	1
	Júnior J. P. A.	1	1
	Mottin V. D.	1	1
	Abilleira F.	1	1
	Paula G. A.	1	1
	Laps R.	1	1
	Fischer E.	1	1
	Chiminazzo C.	1	1
	Cziulik M.	1	1
	Neto P. S.	1	1
	Vilaça S. T.	1	1
	Dalapicolla J.	1	1
	Soares R.	1	1
	Aleixo A.	1	1
	Lunardi V. O.	1	1
	Francisco M. R.	1	1
	Rocha G. T.	1	1
	Goldschmidt B.	1	1
	Junior P. M. G.	1	1
	Barreiros M. H.	1	1
	Gomes F. B. R.	1	1
	Kuniy A. A.	1	1
	Figueiredo I. C. S.	1	1
	Matias R.	1	1
	Ludwig J.	1	1
	Oliveira A. K. M.	1	1
	Bono J. A. M.	1	1
	Martins P. F. R. B.	1	1
	Corsino J.	1	1
	Luque J. A. D.	1	1
	Dénes F. V.	1	1
	Tortato F. R.	1	1
	Bonanomi J.	1	1
	Pacheco J. F.	3	4
	Olmos F.	3	4
	Hennessey B.	1	1
	Carrara L. A.	1	1
	Yabe R. S.	1	1
	Rego M. A.	1	1
	Silveira L. F.	1	1
	Piacentini V. Q.	1	1
	Schunck F.	1	1
	Machado E.	1	1
	Pinheiro R. T.	1	1
	Reis E.	1	1
	Devenish C.	1	1
	Lees A. C.	1	1
	Collar N. J.	1	1
	Marsden S. J.	1	1
	Harrison S. L.	1	1
	Sutton G. P.	1	1
	Herrel A.	1	1
	Deeming D. C.	1	1
	Marchesi M. D.	1	1
	Rossi J. L.	1	1
	Carneiro M. T. W. D.	1	1
	Endringer D. C.	1	1
	Filho C. B. C.	1	1
	Pinho J. B.	1	1
	Nogueira F. M. B.	1	1
	Schneider L.	1	1
	Serbena A. L.	1	1
	Hay J. D.	1	1
	Johnson M. A.	1	1
	Frota A. V. B.	1	1
	Vitorino B. D.	1	1
	Nunes J. R. S.	1	1
	Silva C. J.	1	1
	Almeida F. L. R.	1	1
	Barros C. S.	1	1
	Pires A. S.	1	1
	Bonaparte E. B.	1	1
	Lima C. C.	1	1
	Xavier H. D. F.	1	1
	Hora J. S.	1	1
	Sallo F. G. D.	1	1
	López F. G.	1	1
	Cockle K. L.	1	1
	Montellano M. G. N.	1	1
	Dracxler C. M.	1	1
	Kissling W. D.	1	1
	Abilheira F. S.	1	1
	Conrado L. P.	1	1
	Rdrigues T. M.	1	1
	Barbirato M.	1	1
	Corrêa N. G.	1	1
	Douglas L. R.	1	1
	Veríssimo D.	1	1
	Rodríguez J. P.	1	1
	Paris J. R. F.	1	1
	Mercado A. S.	1	1
	Young A. M.	1	1
	Hobson A.	1	1
	Lackey L. B.	1	1
	Wright T. F.	1	1
	Negrelle R. R. B.	1	1
	Ramos C. A.	1	1
	Ferreira C. J.	1	1
	Ballaben A. S.	1	1
	Filho R. A. C. P.	1	1
	Darini A. L. C.	1	1
	Santos M. P. D.	1	1
	Santana A.	1	1
	Soares L. M. S.	1	1
	Sousa S. A.	1	1
	Barros L. A.	1	1
	Fedullo L. P. L.	1	1
	Almeida F. M.	1	1
	Pinto R. M.	1	1
	A. Borsari	2	3
	B. Ottoni	2	3
	Paim C. S	1	1
	Barros A. D.	2	3
	Sifaoui I	2	3
	Guerra R. D.	2	3
	Morales J. L.	2	3
	Fuentes C. R	2	3
	Lanús E. C.	2	3
	Castaldo J. P. C	1	1
	Byrne A.	1	1
	Perisin K.	1	1
	Faust L. J.	1	1
	Borecka Z.	1	1
